# Supplementary material
Source: PubMed Central journal article supplement (PMC9307782)
Supplement: 42003_2022_3682_MOESM3_ESM.pdf [file 42003_2022_3682_MOESM3_ESM.pdf]

## Description of Additional Supplementary Files

**File name:** Supplementary Data 1

**Description:** Source data for the main figures in the paper.
