# Supplementary material
Source: PubMed Central journal article supplement (PMC9307782)
Supplement: 42003_2022_3682_MOESM4_ESM.pdf [file 42003_2022_3682_MOESM4_ESM.pdf]

Figure 1C:

|               | HC1c       | HC2b        | HC2c     | HC3b      | HC3c     | HC3      | HC4c     | DF2b     | DF2c     | DF2      | DF3b     | DF3c     | DF3      | DF4b     | DF4      | DHF1b    | DHF1c    | DHF1     | DHF3b    | DHF3c    | DHF3     | DHF4b    | DHF4     |
|---------------|------------|-------------|----------|-----------|----------|----------|----------|----------|----------|----------|----------|----------|----------|----------|----------|----------|----------|----------|----------|----------|----------|----------|----------|
| <i>CD38</i>   | 0          | 0.166853683 | 0.217965 | 0.1673242 | 10.13746 | 0.64152  | 0.124822 | 74.20125 | 282.3693 | 58.00911 | 4.677036 | 1.352411 | 23.45087 | 230.5452 | 129.9976 | 76.44541 | 205.7182 | 149.3864 | 29.428   | 175.3114 | 52.11818 | 35.13023 | 56.62818 |
| <i>PTGDR2</i> | 317.542298 | 204.4090663 | 271.1009 | 272.02791 | 181.8508 | 59.93233 | 35.17528 | 48.87048 | 76.41927 | 96.02555 | 17.65753 | 180.4406 | 41.21463 | 31.41569 | 5.445858 | 212.1775 | 167.8657 | 153.4563 | 51.4365  | 86.21358 | 22.20146 | 118.136  | 138.8999 |
| <i>IL7R</i>   | 651.034425 | 529.5203545 | 746.8675 | 535.05404 | 752.3203 | 420.2392 | 676.7903 | 133.3306 | 296.5441 | 193.8106 | 275.5874 | 386.4268 | 232.2026 | 126.5475 | 65.45685 | 507.2311 | 431.6548 | 541.0609 | 278.1389 | 448.5284 | 104.6979 | 287.3132 | 427.4074 |
| <i>IL2RA</i>  | 68.02217   | 68.6153084  | 178.1057 | 113.99608 | 61.85704 | 50.2642  | 111.4572 | 10.62093 | 51.0024  | 21.92908 | 36.06333 | 111.9829 | 55.17974 | 16.87454 | 1.516212 | 123.0104 | 73.86298 | 121.6814 | 22.15842 | 91.18656 | 4.073994 | 34.03433 | 64.15853 |

Figure 1D:

| HC   | DF   | DHF  |
|------|------|------|
| 0.31 | 1.34 | 1.42 |
| 0.14 | 0.37 | 6.27 |
| 0.19 | 1.55 | 2.28 |
| 0.1  | 1.09 | 0.41 |
| 0.24 | 0.65 | 0.58 |
| 0.29 | 1.33 | 0.4  |
| 0.46 | 2.44 | 0.22 |
| 0.5  | 0.21 | 0.56 |
| 0.53 | 0.04 | 0.69 |
| 0.14 | 0.57 | 0.57 |
| 0.41 | 0.31 | 0.12 |
| 0.55 | 0.6  | 0.25 |
| 0.48 | 0.78 | 0.81 |
| 0.48 | 0.76 | 1.04 |
| 0.77 | 1.4  | 0.33 |
|      | 0.21 | 1.04 |
|      | 0.14 |      |
|      | 0.23 |      |
|      | 0.3  |      |
|      | 0.02 |      |
|      | 0.17 |      |
|      | 0.47 |      |
|      | 0.2  |      |
|      | 0.59 |      |
|      | 0.23 |      |
|      | 0.47 |      |
|      | 0.16 |      |
|      | 0.7  |      |
|      | 0.28 |      |

Figure 1F:

| Healthy | Dengue patients |
|---------|-----------------|
| 1.25    | 78.2            |
| 2.95    | 81.6            |
| 5.86    | 57.8            |
| 8.59    | 86.9            |
| 11.4    | 21.3            |
| 2.96    | 2.36            |
| 0.096   | 55.4            |
| 4.43    | 31.4            |
| 0.056   | 3.82            |

Figure 2A:

| -    | DV - HI | DVAb | DV   | DV + DVAb |
|------|---------|------|------|-----------|
| 0.06 | 0.02    | 0.07 | 12   | 6.32      |
| 0.59 | 0.08    | 0.4  | 8.13 | 4.88      |
| 0.36 | 0.29    | 0.49 | 6.47 | 2.87      |
| 0.03 | 0       | 0    | 5.52 | 3.64      |
| 0    | 0       | 0.03 | 3.5  | 1.97      |

Figure 2B:

| Mock | 0.01  | 0.1  | 1     | 5     |
|------|-------|------|-------|-------|
| 0.09 | 0.15  | 1.28 | 14.36 | 28.5  |
| 0.56 | 0.06  | 2.65 | 8.65  | 25.4  |
| 0.85 | 0.058 | 4.25 | 6.36  | 29.6  |
| 0.05 | 0.06  | 1.65 | 5.62  | 22.53 |

Figure 2C:

| IL-33 (0-50ng/ml) |      |       |      |      |
|-------------------|------|-------|------|------|
| 0                 | 0.05 | 0.5   | 5    | 50   |
| 19.2              | 15.5 | 18.5  | 21.6 | 33.5 |
| 15.4              | 16.5 | 19.05 | 22.8 | 30.4 |
| 14                | 14.5 | 19.2  | 30   | 39.6 |
| 12.2              | 16.5 | 21.8  | 27.3 | 38.6 |

PGD2 (0-200nM)

| 0    | 0.2  | 2    | 20   | 200  |
|------|------|------|------|------|
| 19.2 | 20.2 | 22.3 | 31.1 | 51.4 |
| 15.4 | 20   | 20.7 | 34.8 | 48.8 |
| 14   | 18.1 | 21   | 45.4 | 63.5 |
| 13.8 | 16.3 | 24.2 | 46.2 | 66.1 |

LTE4 (0-100nM)

| 0    | 0.1  | 1    | 10   | 100  |
|------|------|------|------|------|
| 19.2 | 19.4 | 20.7 | 32.3 | 42.3 |
| 15.4 | 15.3 | 18.7 | 26.7 | 33.8 |
| 14   | 16.4 | 16   | 28.5 | 35.6 |
| 13.6 | 20.9 | 21.2 | 35.9 | 50.2 |

Figure 2E:

| -     | DV    | IL-33 | +DV  | PGD2+DV | IL33<br>PGD2+DV |
|-------|-------|-------|------|---------|-----------------|
| 19.3  | 27.9  | 43.9  | 50.4 | 0.97    |                 |
| 14.51 | 18.21 | 28.3  | 51.5 | 0.64    |                 |
| 9.5   | 12.67 | 33.7  | 47.3 | 0.17    |                 |
| 18.8  | 38.6  | 44.6  | 49.5 | 0.9     |                 |
| 10.56 | 20.45 | 30.56 | 48.7 | 0.76    |                 |

Figure 2F:

| -  | DV   | IL-33 +DV | PGD2+DV | IL33<br>PGD2+DV |
|----|------|-----------|---------|-----------------|
| 8  | 1064 | 1264      | 2532    | 2876            |
| 12 | 504  | 984       | 1744    | 2892            |
| 36 | 1104 | 2208      | 3312    | 4684            |
| 20 | 700  | 2364      | 2636    | 4052            |

Figure 3C:

|               | HC1c       | HC2b        | HC2c     | HC3b      | HC3c     | HC3      | HC4c     | DF2b     | DF2c     | DF2      | DF3b     | DF3c     | DF3      | DF4b     | DF4      | DHF1b    | DHF1c    | DHF1     | DHF3b    | DHF3c    | DHF3     | DHF4b    | DHF4     |
|---------------|------------|-------------|----------|-----------|----------|----------|----------|----------|----------|----------|----------|----------|----------|----------|----------|----------|----------|----------|----------|----------|----------|----------|----------|
| <i>IFITM3</i> | 189.194647 | 735.1638201 | 704.9473 | 831.35225 | 453.2733 | 293.0615 | 815.7602 | 1600.563 | 1317.287 | 761.5987 | 3236.187 | 3108.786 | 4451.986 | 561.8489 | 467.1749 | 953.0102 | 735.6661 | 527.0203 | 461.421  | 508.8151 | 334.7859 | 2739.19  | 1551.522 |
| <i>ISG15</i>  | 70.9026579 | 212.1717441 | 493.5787 | 447.8285  | 98.34552 | 289.1542 | 1989.077 | 1240.879 | 1230.304 | 931.7143 | 4778.48  | 3325.62  | 4008.094 | 846.8272 | 2026.233 | 1308.151 | 645.3055 | 499.2058 | 330.1089 | 412.9974 | 1145.761 | 943.2264 | 733.2953 |
| <i>OAS1</i>   | 1.03824321 | 6.253867291 | 29.24711 | 21.887544 | 52.94976 | 2.725091 | 124.0728 | 98.60924 | 169.1883 | 51.95895 | 202.7952 | 207.2879 | 202.4456 | 96.26013 | 53.62771 | 200.6353 | 70.59182 | 49.21682 | 65.24099 | 53.00204 | 9.540101 | 168.1771 | 151.8644 |
| <i>RSAD2</i>  | 1.72480814 | 1.487572795 | 0.138804 | 14.775603 | 16.52104 | 0.998631 | 36.8297  | 21.77595 | 47.38521 | 43.19275 | 156.7587 | 115.4441 | 155.7623 | 4.765667 | 22.56186 | 11.94294 | 14.97405 | 11.52799 | 7.797358 | 31.73825 | 1.929635 | 18.48007 | 27.29295 |
| <i>STAT1</i>  | 32.3225071 | 56.18287154 | 40.84486 | 93.140064 | 61.13799 | 45.01127 | 59.85708 | 91.59174 | 100.0582 | 111.9754 | 219.2696 | 174.6735 | 219.528  | 70.9646  | 54.26206 | 33.12152 | 51.10727 | 77.6075  | 89.22053 | 93.86871 | 35.09446 | 62.53115 | 79.54369 |

Figure 3D:

| <i>IFITM3</i> |            |             | <i>OAS1</i> |          |          | <i>ISG15</i> |          |          | <i>RSAD2</i> |          |          | <i>STAT1</i> |          |          |
|---------------|------------|-------------|-------------|----------|----------|--------------|----------|----------|--------------|----------|----------|--------------|----------|----------|
| Unstim        | PGD2       | IFN-Beta    | Unstim      | PGD2     | IFN-Beta | Unstim       | PGD2     | IFN-Beta | Unstim       | PGD2     | IFN-Beta | Unstim       | PGD2     | IFN-Beta |
| 0.184091942   | 0.18234742 | 2.236450789 | 0.0146559   | 0.006985 | 1.472728 | 0.416402     | 0.113959 | 8.441589 | 0.581014     | 0.411995 | 2.312387 | 0.220123     | 0.172494 | 3.95088  |
| 0.05839455    | 0.04627613 | 1.40906811  | 0.0152469   | 0.005718 | 0.950596 | 0.173831     | 0.094767 | 4.897649 | 0.336111     | 0.267413 | 1.520265 | 0.282293     | 0.275931 | 4.143253 |

|             |            |             |
|-------------|------------|-------------|
| 0.047929377 | 0.02854955 | 1.198031543 |
| 0.318585902 | 0.19303547 | 1.902644408 |
| 0.256435464 | 0.09654347 | 1.265435835 |

|           |          |          |
|-----------|----------|----------|
| 0.0100139 | 0.006379 | 1.102674 |
| 0.0134976 | 0.004846 | 1.307304 |
| 0.0125875 | 0.005765 | 1.265787 |

|          |          |          |
|----------|----------|----------|
| 0.107034 | 0.036491 | 5.529766 |
| 0.298817 | 0.086242 | 10.14409 |
| 0.06324  | 0.028778 | 3.314778 |

|          |          |          |
|----------|----------|----------|
| 0.29101  | 0.164306 | 1.726246 |
| 0.353828 | 0.258869 | 1.881046 |
| 0.23567  | 0.15154  | 1.305544 |

|          |          |          |
|----------|----------|----------|
| 0.144545 | 0.101401 | 3.857092 |
| 0.354392 | 0.225384 | 5.109519 |
| 0.098722 | 0.066044 | 3.444555 |

Figure 3E:

| -    | DV    | IFN-B<br>25IU/ml + DV | IFN-B<br>250IU/ml<br>+ DV |
|------|-------|-----------------------|---------------------------|
| 0    | 19.3  | 0.97                  | 0.16                      |
| 0.04 | 14.51 | 0.64                  | 0.24                      |
| 0.03 | 9.5   | 0.17                  | 0.086                     |
| 0.02 | 18.8  | 0.9                   | 0.11                      |
| 0.01 | 10.56 | 0.76                  | 0.15                      |

Figure 4A:

| IFNLR1      | Unstim     | PGD2        | IFN-Beta |
|-------------|------------|-------------|----------|
| 0.017026189 | 0.00687898 | 0.038168355 |          |
| 0.024741068 | 0.01316431 | 0.049733984 |          |
| 0.016524664 | 0.00596457 | 0.071823115 |          |
| 0.009511281 | 0.00301757 | 0.034704535 |          |
| 0.035975805 | 0.00942917 | 0.0582151   |          |

Figure 4B:

| OA51        | PGD2       | IFN-β       | PGD2 200nM<br>+ IFN-β | PGD2 20nM<br>+ IFN-β | PGD2 2nM<br>+ IFN-β |
|-------------|------------|-------------|-----------------------|----------------------|---------------------|
| 0.007218438 | 11.2320225 | 1.543234701 | 1.572002              | 4.2667674            |                     |
| 0.009702309 | 6.58455326 | 2.254354769 | 2.434122              | 6.6077035            |                     |
| 0.242781964 | 7.77930086 | 2.582510857 | 2.491872              | 5.138622             |                     |

Figure 4E:

| DV   | DV<br>TM30089 + | PGD2 + DV | PGD2 + DV<br>TM30089 | IL-33 + DV | IL-33 + DV<br>TM30089 |
|------|-----------------|-----------|----------------------|------------|-----------------------|
| 12.3 | 10.8            | 47.4      | 16.7                 | 50.1       | 23.8                  |
| 14.6 | 11.2            | 49.2      | 22.6                 | 50.3       | 24.5                  |
| 16.1 | 12.4            | 47.6      | 35.4                 | 51.4       | 42.8                  |
| 16   | 12.4            | 58.1      | 27.9                 | 39.5       | 23.3                  |
| 27.3 | 20.1            | 57.8      | 17.8                 | 28.2       | 17.8                  |

Figure 4F:

| DV    | DV + MLK | LTE4 + DV | LTE4 + DV<br>+ MLK | PGD2 + DV | PGD2 + DV<br>+ MLK | IL33 + DV | IL-33 + DV<br>+ MLK |
|-------|----------|-----------|--------------------|-----------|--------------------|-----------|---------------------|
| 26.9  | 26.4     | 55.1      | 24.5               | 63.3      | 67.4               | 69.4      | 69.1                |
| 21.01 | 20.86    | 44.7      | 14.88              | 46.3      | 45.3               | 52.55     | 50.03               |
| 15.3  | 15.5     | 46.4      | 22.3               | 58.6      | 58.2               | 45.6      | 42.6                |
| 18.78 | 17.83    | 40.76     | 23.57              | 50.87     | 48.54              | 48.7      | 47.9                |

Figure 5C:

| MMR% | U ILC2 sp | U ILC2 sp +<br>IL4Rab | U ILC2 sp +<br>GM-CSFb | A ILC2 sp | A ILC2 sp +<br>IL4Rab | A ILC2 sp +<br>GM-CSFb |
|------|-----------|-----------------------|------------------------|-----------|-----------------------|------------------------|
| 15.9 | 29.9      | 28.3                  | 20.5                   | 68.9      | 67.6                  | 52.4                   |
|      | 38.4      | 41.6                  | 32.6                   | 68.4      | 68                    | 41.6                   |
| 11.4 | 39.2      | 35.6                  | 16.6                   | 74.4      | 76                    | 55.1                   |
| 19.5 | 45.9      | 49.5                  | 31.8                   | 88.4      | 85.3                  | 60.7                   |
| 6.38 | 43.4      | 41                    | 14.9                   | 71.8      | 73.2                  | 65.9                   |
| 25.6 | 52.9      | 45.6                  | 39.6                   | 76.6      | 79.1                  | 72.1                   |

Figure 5D:

| DV infection% | U ILC2 sp | U ILC2 sp +<br>IL4Rab | U ILC2 sp +<br>GM-CSFb | A ILC2 sp | A ILC2 sp +<br>IL4Rab | A ILC2 sp +<br>GM-CSFb |
|---------------|-----------|-----------------------|------------------------|-----------|-----------------------|------------------------|
| 1.13          | 4.78      | 9.86                  | 6.69                   | 26.5      | 29.9                  | 9.86                   |
| 0.35          | 9.18      | 8.71                  | 7.95                   | 23.4      | 21.3                  | 11                     |
| 1.9           | 9.8       | 9.7                   | 6.7                    | 20        | 18.9                  | 13.7                   |
| 0.056         | 9.02      | 13.6                  | 7.25                   | 18.5      | 23.2                  | 14.3                   |
| 0.06          | 6.41      | 8.07                  | 2.69                   | 11.4      | 18.5                  | 18                     |

Figure 5E:

| Mock | Mannan<br>20ug/ml | DV    | Mannan<br>20ug/ml +<br>DV |
|------|-------------------|-------|---------------------------|
| 0.51 | 0.75              | 19.6  | 11                        |
| 0.66 | 0.77              | 18.44 | 15.43                     |
| 0.51 | 0.75              | 14.6  | 10.7                      |
| 0.66 | 0.27              | 10.44 | 5.43                      |
| 0.48 | 0.34              | 17.5  | 13.3                      |

Figure 6A:

| DF     |        |         |        |       |        |        |       |        |        | DHF   |        |        |        |        |         |        |        |        |        |
|--------|--------|---------|--------|-------|--------|--------|-------|--------|--------|-------|--------|--------|--------|--------|---------|--------|--------|--------|--------|
|        | 603.14 | 633.58  |        | 81.55 |        |        |       | 130.41 | 105.48 |       |        |        |        |        | 331.23  |        | 409.67 |        |        |
| 983.36 | 167.07 | 1125.48 | 347.28 | 69.87 | 217.78 | 261.01 | 75.6  | 51.77  | 69.39  | 28.78 | 586.61 | 149.86 | 960.59 | 43.08  | 2271.23 | 262.53 | 201.65 | 59.99  | 247.55 |
| 236.71 |        | 517.81  | 131.59 | 72.19 | 457.01 | 155.14 |       | 172.52 |        | 34.11 | 177    | 371.43 | 49.68  | 467.13 | 3099.58 | 112.55 | 193.88 | 158.89 |        |
| 493.45 |        |         | 39.19  |       | 57     | 194.7  | 88.12 | 67.56  |        |       |        | 1622.9 | 237.24 | 382.19 | 3073.02 | 114.74 |        | 20.79  |        |

Figure 6B:

| 24 hrs<br>before<br>entering<br>critical stage | Critical<br>stage |
|------------------------------------------------|-------------------|
| 149.86                                         | 371.43            |
|                                                | 960.59            |
| 43.08                                          | 467.13            |
| 391.67                                         | 282.73            |
| 140.26                                         | 141.42            |
| 185.24                                         | 383.78            |
|                                                | 458.85            |
